# Supplementary material for: A Fucus vesiculosus extract inhibits estrogen receptor activation and induces cell death in female cancer cell lines
Source: Springer Nature journal article supplement (doi:10.1186/s12906-016-1129-6), 2016-05-28

**Table S1.** Panels of 248 genes analyzed for expression profiling with Nanostring™ nCounter® and the 6 housekeeping reference genes used for normalization.

| Housekeeping | Cancer |          | Immunity |          |          | Endocrine |         | Kinome  | Transcription | Metabolism | Structural  |
|--------------|--------|----------|----------|----------|----------|-----------|---------|---------|---------------|------------|-------------|
| B-Tubulin    | BECN1  | IFNA1    | AHR      | CTF1     | SOCS3    | AR        | LEPR    | IFNK    | ARNT          | ACPP       | COL12A1     |
| G6DP         | BIRC2  | IFNGR1   | ATG10    | FADD     | SOCS4    | AGT       | MSMB    | IGF1R   | AZGP1         | AKR1C4     | KRT1        |
| GAPDH        | BIRC5  | IFNGR2   | ATG12    | IFNG     | SOCS5    | AGTR1     | PGR     | IRAK1   | BAG3          | AKR1D1     | KRT10       |
| POLR2A       | BIRC6  | IGF1     | ATG5     | IKBKB    | SOCS7    | CLCF1     | PRL     | IRAK2   | BAG4          | ANPEP      | KRT14       |
| RPL19        | BIRC8  | IGFBP2   | ATG7     | IKBKE    | STAT1    | CNTF      | PRLR    | IRAK3   | ELF5          | APAF1      | KRT2        |
| TBP          | BRAF   | JUN      | BAX      | IKBKG    | STAT2    | COMT      | PROCR   | IRAK4   | FUR           | BAK1       | KRT9        |
|              | BRCA1  | KLK5     | BCL10    | IRF1     | STAT3    | CUBN      | SRD5A1  | JAK1    | HMGB2         | GAA        | LC3         |
|              | BRCA2  | LCN2     | BCL2     | IRF2     | STAT4    | CYP11A1   | SRD5A2  | JAK2    | KLF5          | LMAN2      | LMNA        |
|              | CBL    | MCL1     | BCL2A1   | IRF3     | STAT5A   | CYP11B1   | SULT1E1 | JAK3    | P56           | NAT1       | LMNB1       |
|              | CBLB   | MED1     | BCL2L11  | IRF4     | STAT5B   | CYP11B2   | SULT2A1 | MAP2K2  | RAD1          | NAT2       | SEMG1       |
|              | CBLC   | MKI67    | BCLAF1   | IRF5     | STAT6    | CYP17A1   | SULT2B1 | MAP2K7  | RAD17         | PFKM       | SEMG2       |
|              | CDH1   | MMP3     | BID      | IRF6     | TNFAIP2  | CYP19A1   | VEGF    | MAP3K14 | RAD9A         | SERPINA3   | SMOC1 (OAS) |
|              | EGF    | MMP9     | BIK      | IRF7     | TNFRSF1A | CYP21A2   | VEGFR   | MAPK10  | TOP2B         | SMYD2      | SYNE2       |
|              | EGFR   | MUC1     | CARD6    | IRF9     | TNFRSF1B | CYP7B1    |         | NTRK1   |               | SOS1       | TP53BP2     |
|              | ENO1   | P21      | CASP1    | ITGA6    | TNFRSF21 | GABARAP   |         | PIK3R4  |               | SOS2       |             |
|              | ESR1   | PPARGC1A | CASP10   | ITGB4    | TNFRSF25 | GH2       |         | PKA     |               | TF         |             |
|              | ESR2   | PRRC2A   | CASP14   | JMJD6    | TNFRSF9  | GHR       |         | PRKAA1  |               |            |             |
|              | FANCA  | PTPN11   | CASP2    | LGALS3BP | TNFSF10  | HSD11B1   |         | PRKACA  |               |            |             |
|              | FANCC  | PTPN6    | CASP3    | LTBR     | TNFSF8   | HSD11B2   |         | PRKACB  |               |            |             |
|              | FANCD2 | SPRY1    | CASP4    | MASP2    | TRAF1    | HSD17B1   |         | PRKACG  |               |            |             |
|              | FANCE  | SPRY2    | CASP5    | NFKB2    | TRAF3    | HSD17B2   |         | PRKAR1A |               |            |             |
|              | FANCF  | SPRY3    | CASP6    | NFKBIE   | TRAF6    | HSD17B3   |         | PRKAR2A |               |            |             |
|              | FANCG  | SPRY4    | CASP7    | PIGR     |          | HSD17B7   |         | PRKAR2B |               |            |             |
|              | FBN1   | TGFa     | CASP8    | PRF1     |          | HSD17B8   |         | PTK2B   |               |            |             |
|              | FOS    | TNF      | CASP9    | RNASE2   |          | HSD3B1    |         | SPRED1  |               |            |             |
|              | GATA   | XIAP     | CD70     | SLC2A1   |          | HSD3B2    |         | SPRED2  |               |            |             |
|              | GSDMA  | YAP      | CFHR1    | SOCS1    |          | INS       |         | ULK1    |               |            |             |
|              | HIF1A  |          | CISH     | SOCS2    |          | LEP       |         |         |               |            |             |

**Fig. S1. Assays of toxicity.** (A) Effects of FVE on membrane permeability and on mitochondrial ATP. (B) Digitonin was used as a positive control for primary necrosis. (C) Carbonyl cyanide m-chlorophenyl hydrazone (CCCP) was used as the positive control for mitochondrial toxicity.

**Fig. S2. Morphological alterations.** (A) FVE-untreated and (B) cells treated with 1.0 % FVE for 48 hr .

**Fig. S3. Heatmap of differential mRNA expression following FVE treatment at 0.25 % and 1.0 % for 4 hr in MCF7, T47D, MDA-MB-231, HEC-1-B, RL95-2 and OVCAR-3 cell lines.** Expression levels are scaled for each gene compared to untreated controls.

Significance level,  $p < 0.05$ .

**Fig. S4. Treatment of MCF7, MDA-MB-231, HEC-1-B, MES-SA, AN3-CA, OVCAR-3 and Caov-3 cells with apoptosis (VAD) and autophagy (3MA) inhibitors.**

\* Indicates significant difference with FVE without inhibitor ( $p < 0.05$ ).

**Fig. S5. FVE-induced apoptosis via caspase3/7-mediated PARP cleavage in MDA-MB-231 cells.** Significant accumulation of the large fragment of PARP1 produced by caspase-3 cleavage was detected in MDA-MB-231 cells. The antibody does not recognize full length PARP1 or other PARP isoforms. \* $p < 0.05$ ; \*\* $p < 0.01$  compared to control.

**Fig. S6. FVE down-regulates PI3K/Akt/mTOR signaling in MCF-7 cells.** (A) FVE reduced Akt phosphorylation at Ser473 and Thr308, (B) decreased PI3K, 4-EB-P1 and p70S6K phosphorylation, and (C) promoted accumulation of phospho-Beclin 1 and LC3B II. Data are from three or more independent Western blots normalized by  $\beta$ -actin levels to account for loading variability. \* $p < 0.05$ ; \*\* $p < 0.01$  compared to control.

**Fig. S7. FVE down-regulates PI3K/Akt/mTOR signaling in MDA-MB-231 cells.** (A) FVE reduced Akt phosphorylation at Ser473 and Thr308, (B) decreased PI3K, 4-EB-P1 and p70S6K phosphorylation, and (C) promoted accumulation of phospho-Beclin 1 and LC3B II. Data are from three or more independent Western blots normalized by  $\beta$ -actin levels to account for loading variability. \* $p < 0.05$ ; \*\* $p < 0.01$  compared to control.

**Fig. S8. Fucoïdan up-regulates phosphor-Akt.** (A) Fucoïdan increased Akt phosphorylation at Ser473 in MCF-7 cells in a concentration dependent manner and there is no change of Akt phosphorylation at Thr308. (B) Fucoïdan increased Akt phosphorylation at Ser473 in MDA-MB-231 cells in a concentration and time dependent manner and no apparent changes of Akt phosphorylation at Thr308.

Fig. S1

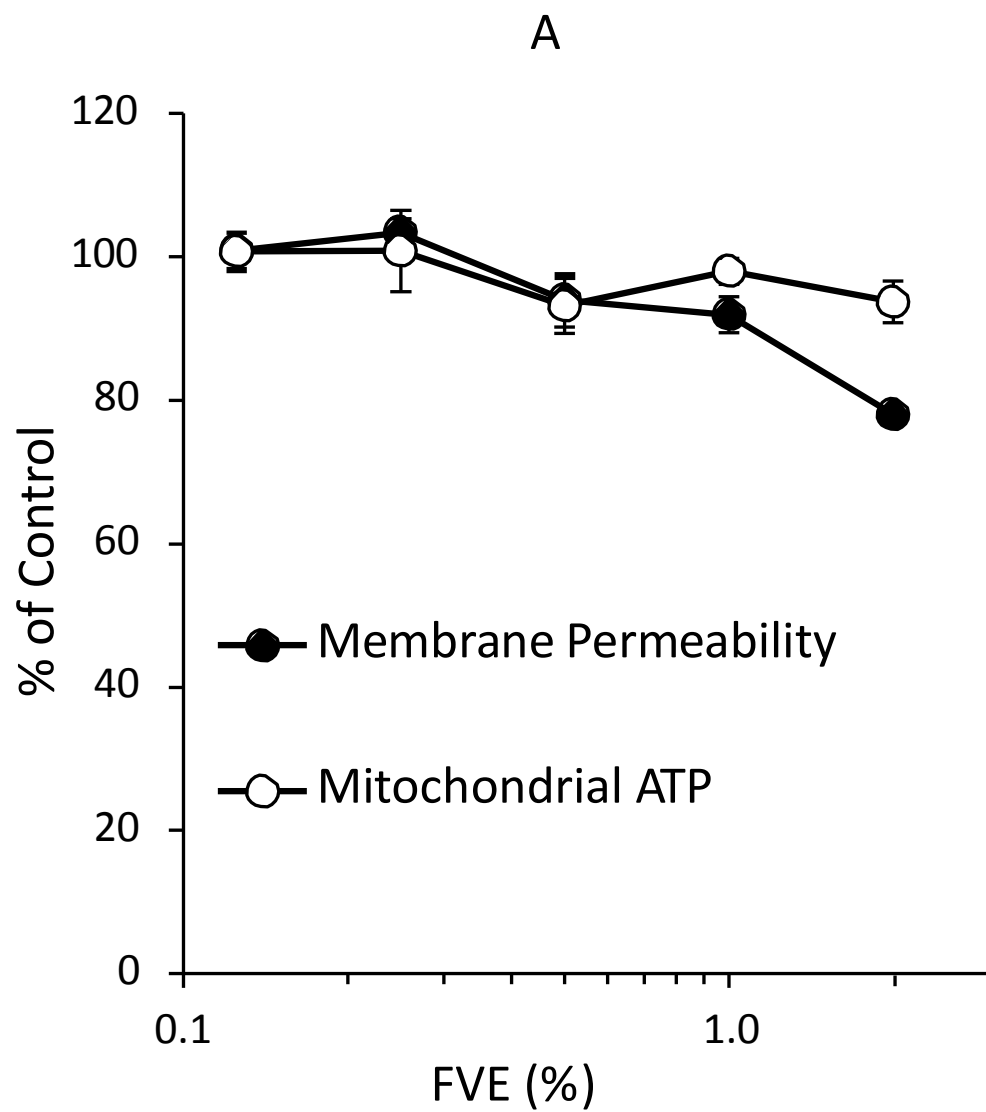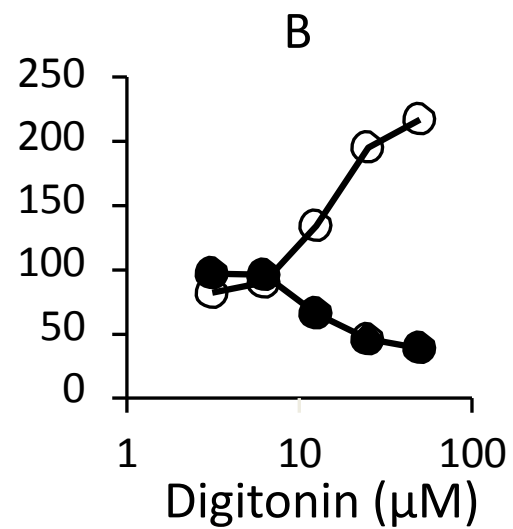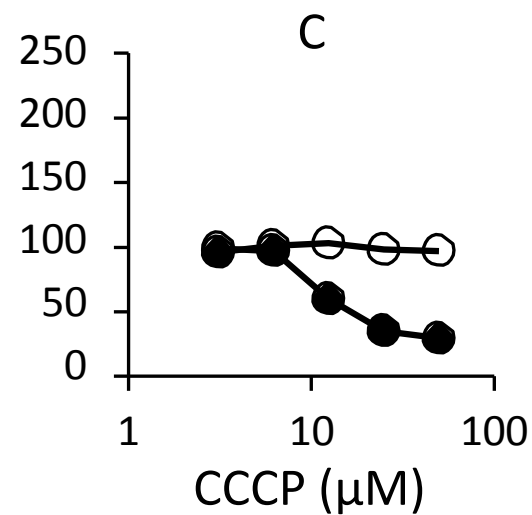

Fig. S2

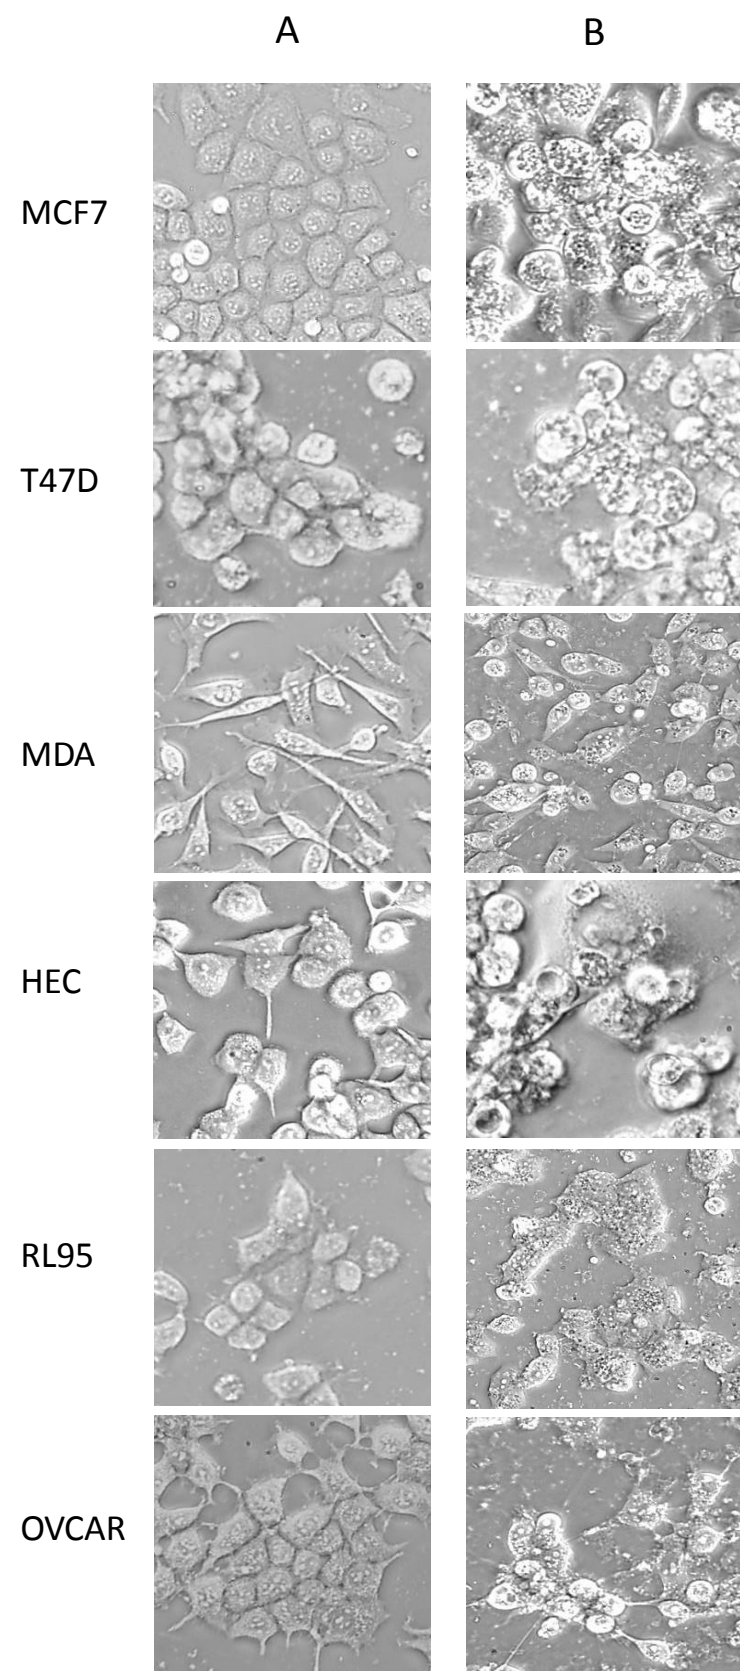

Fig. S3

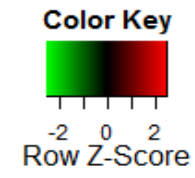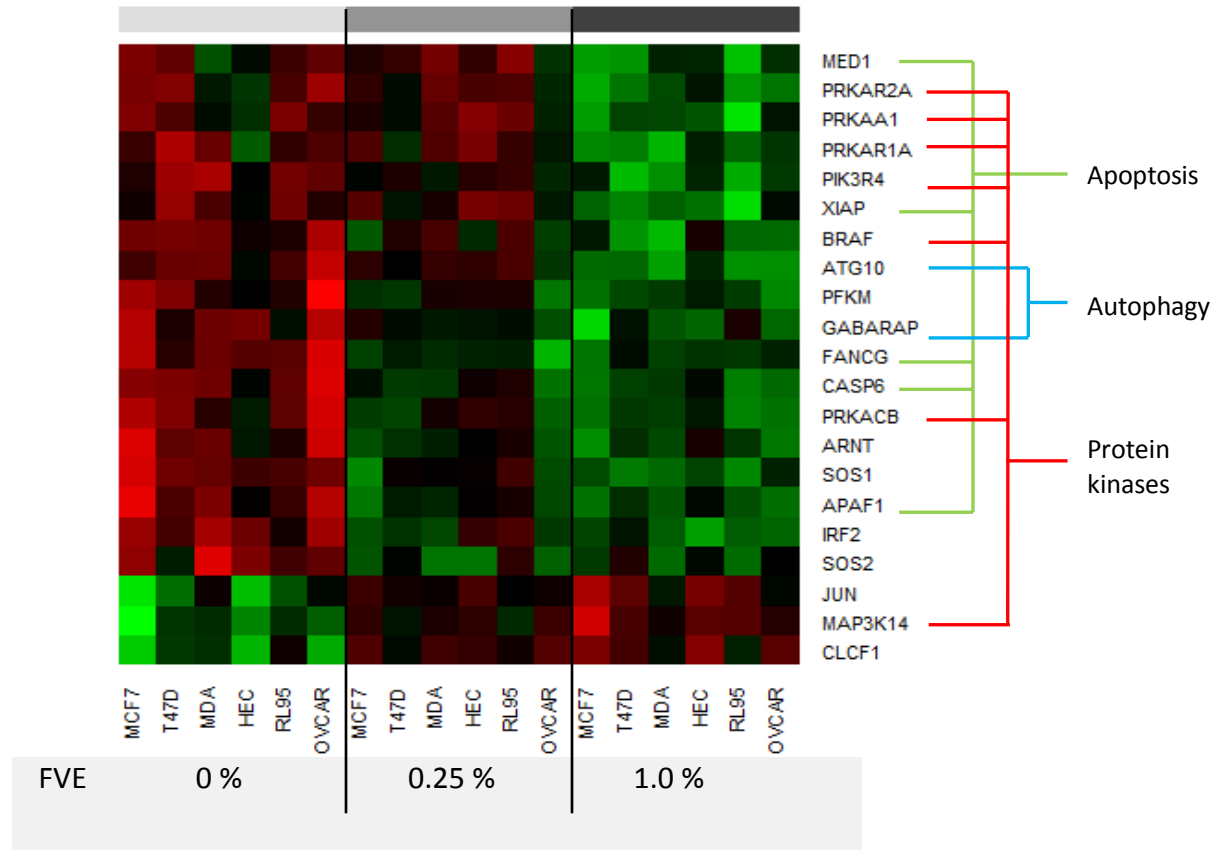

Fig. S4

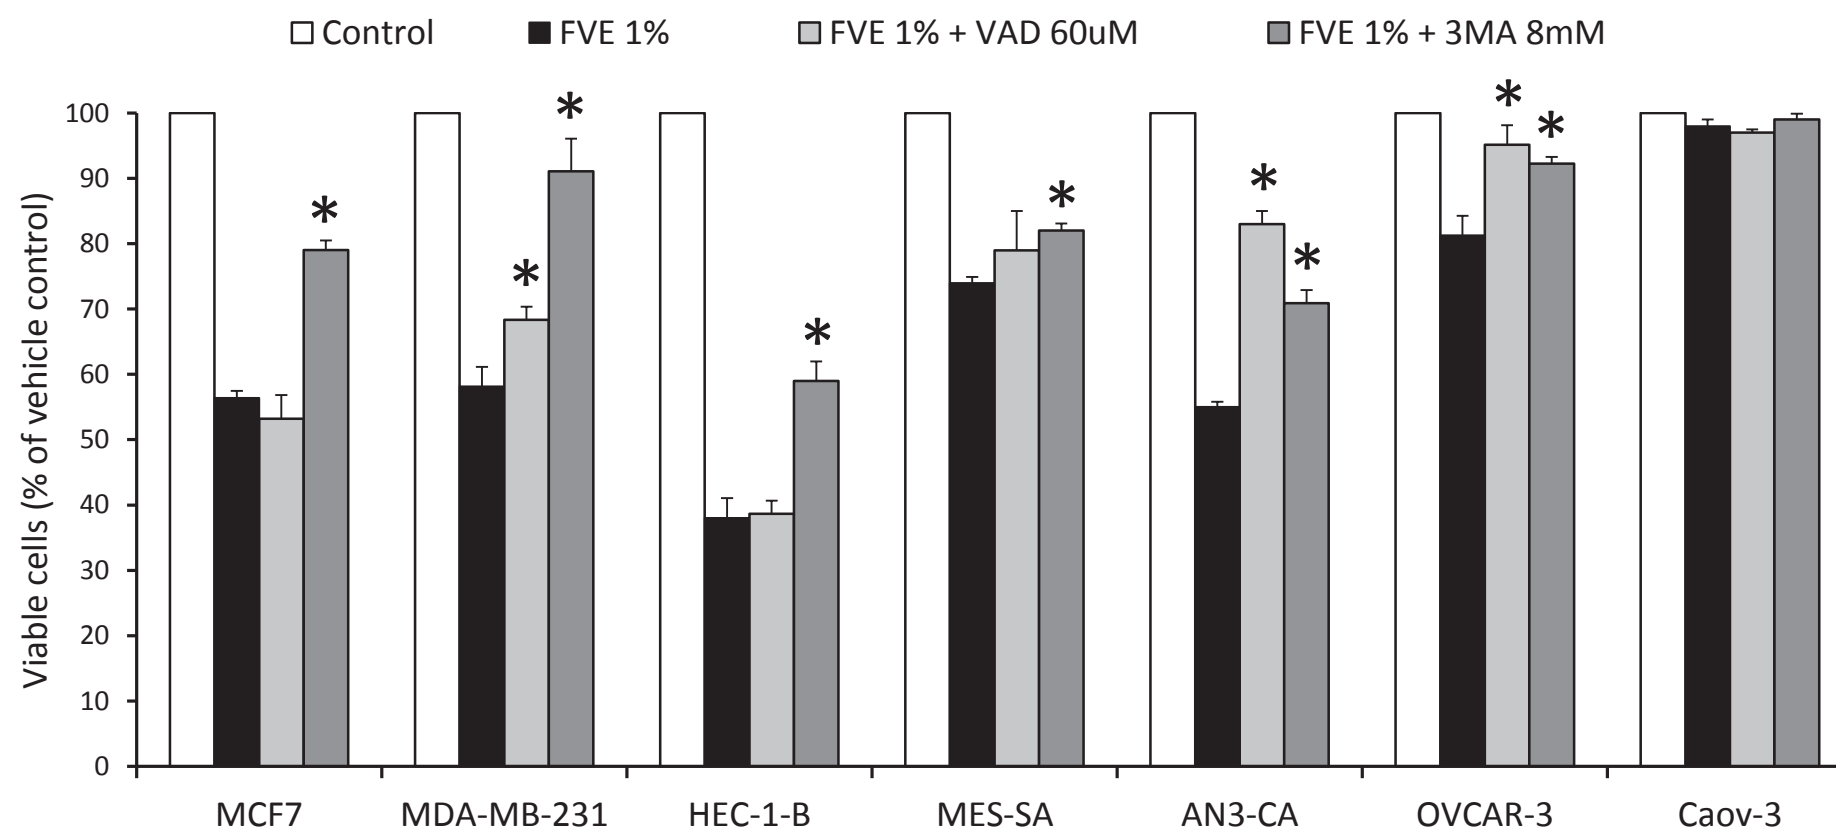

Fig.S5

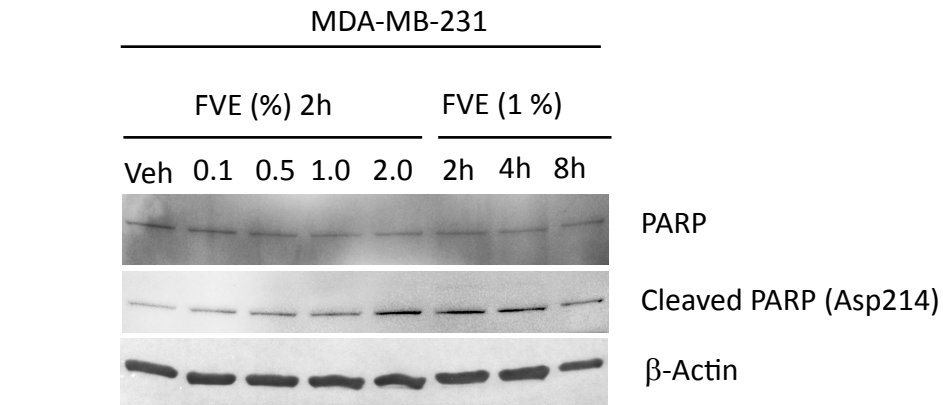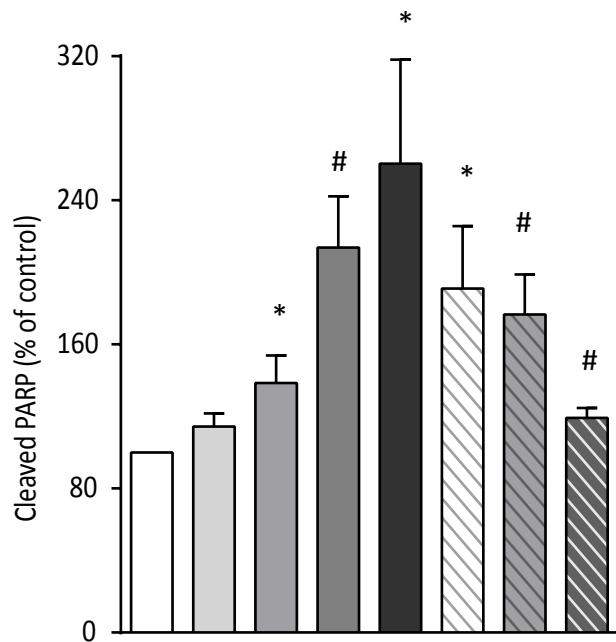



Fig. S6

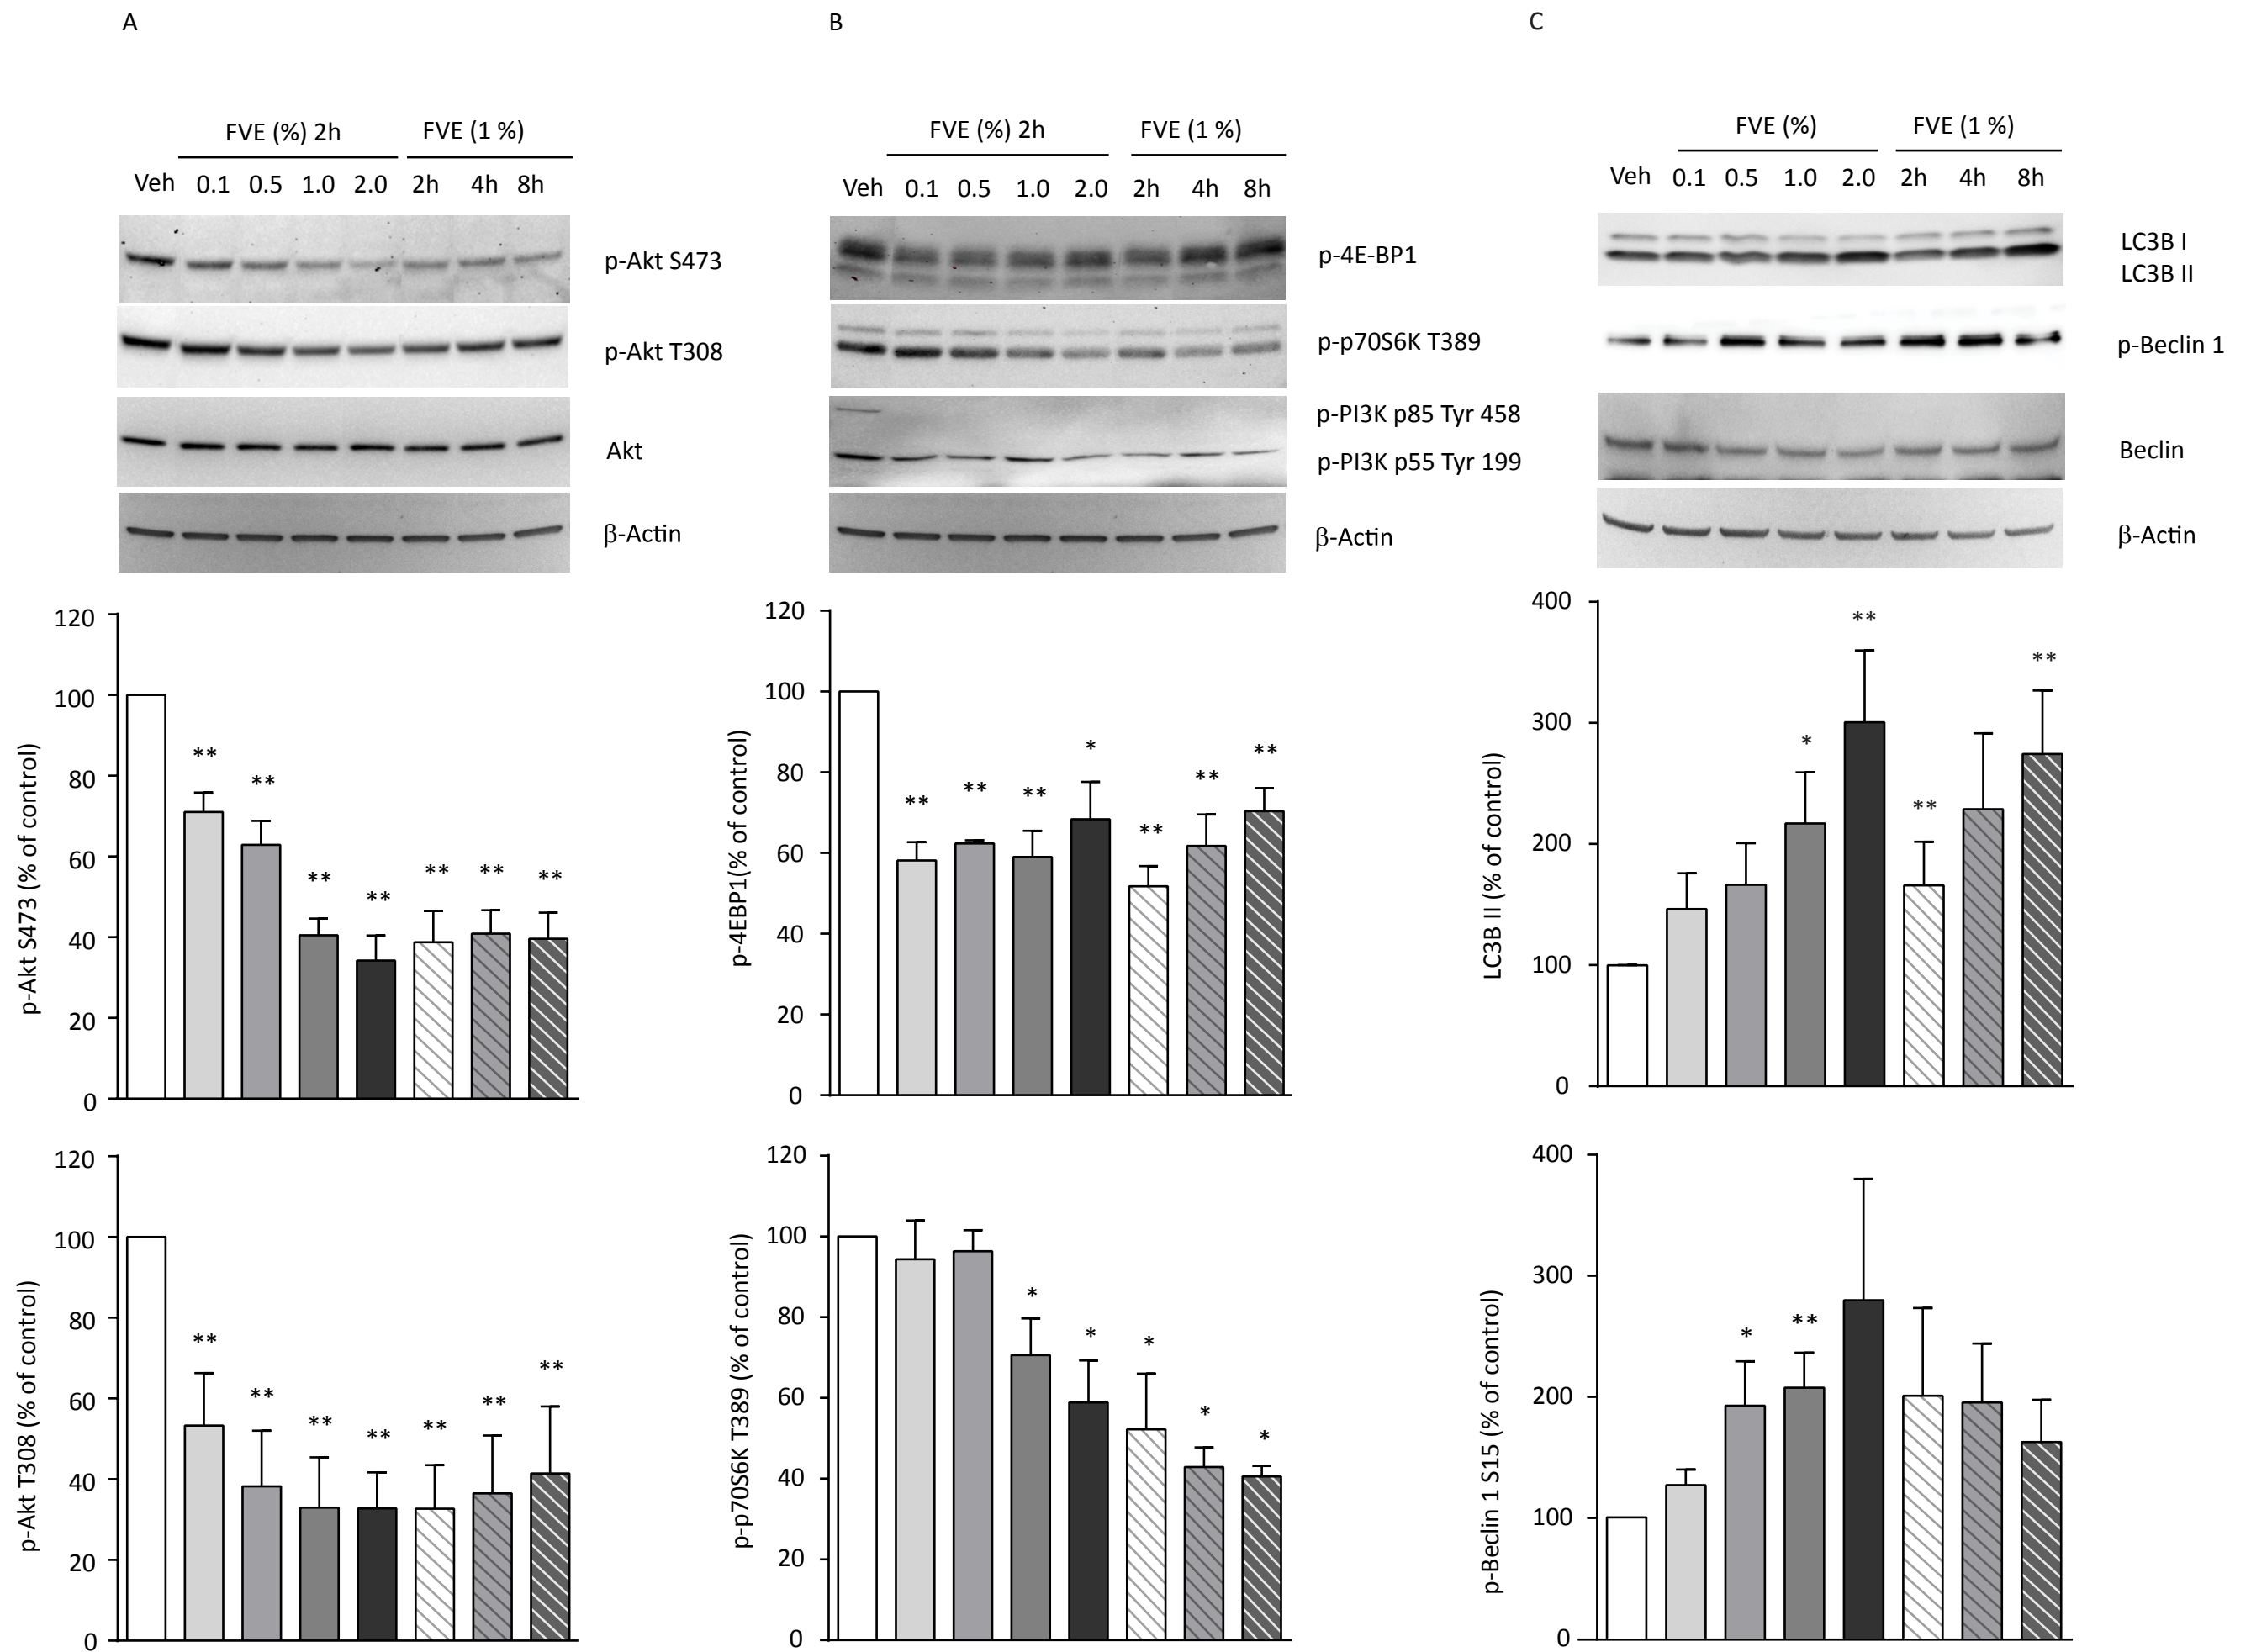

Fig. S7

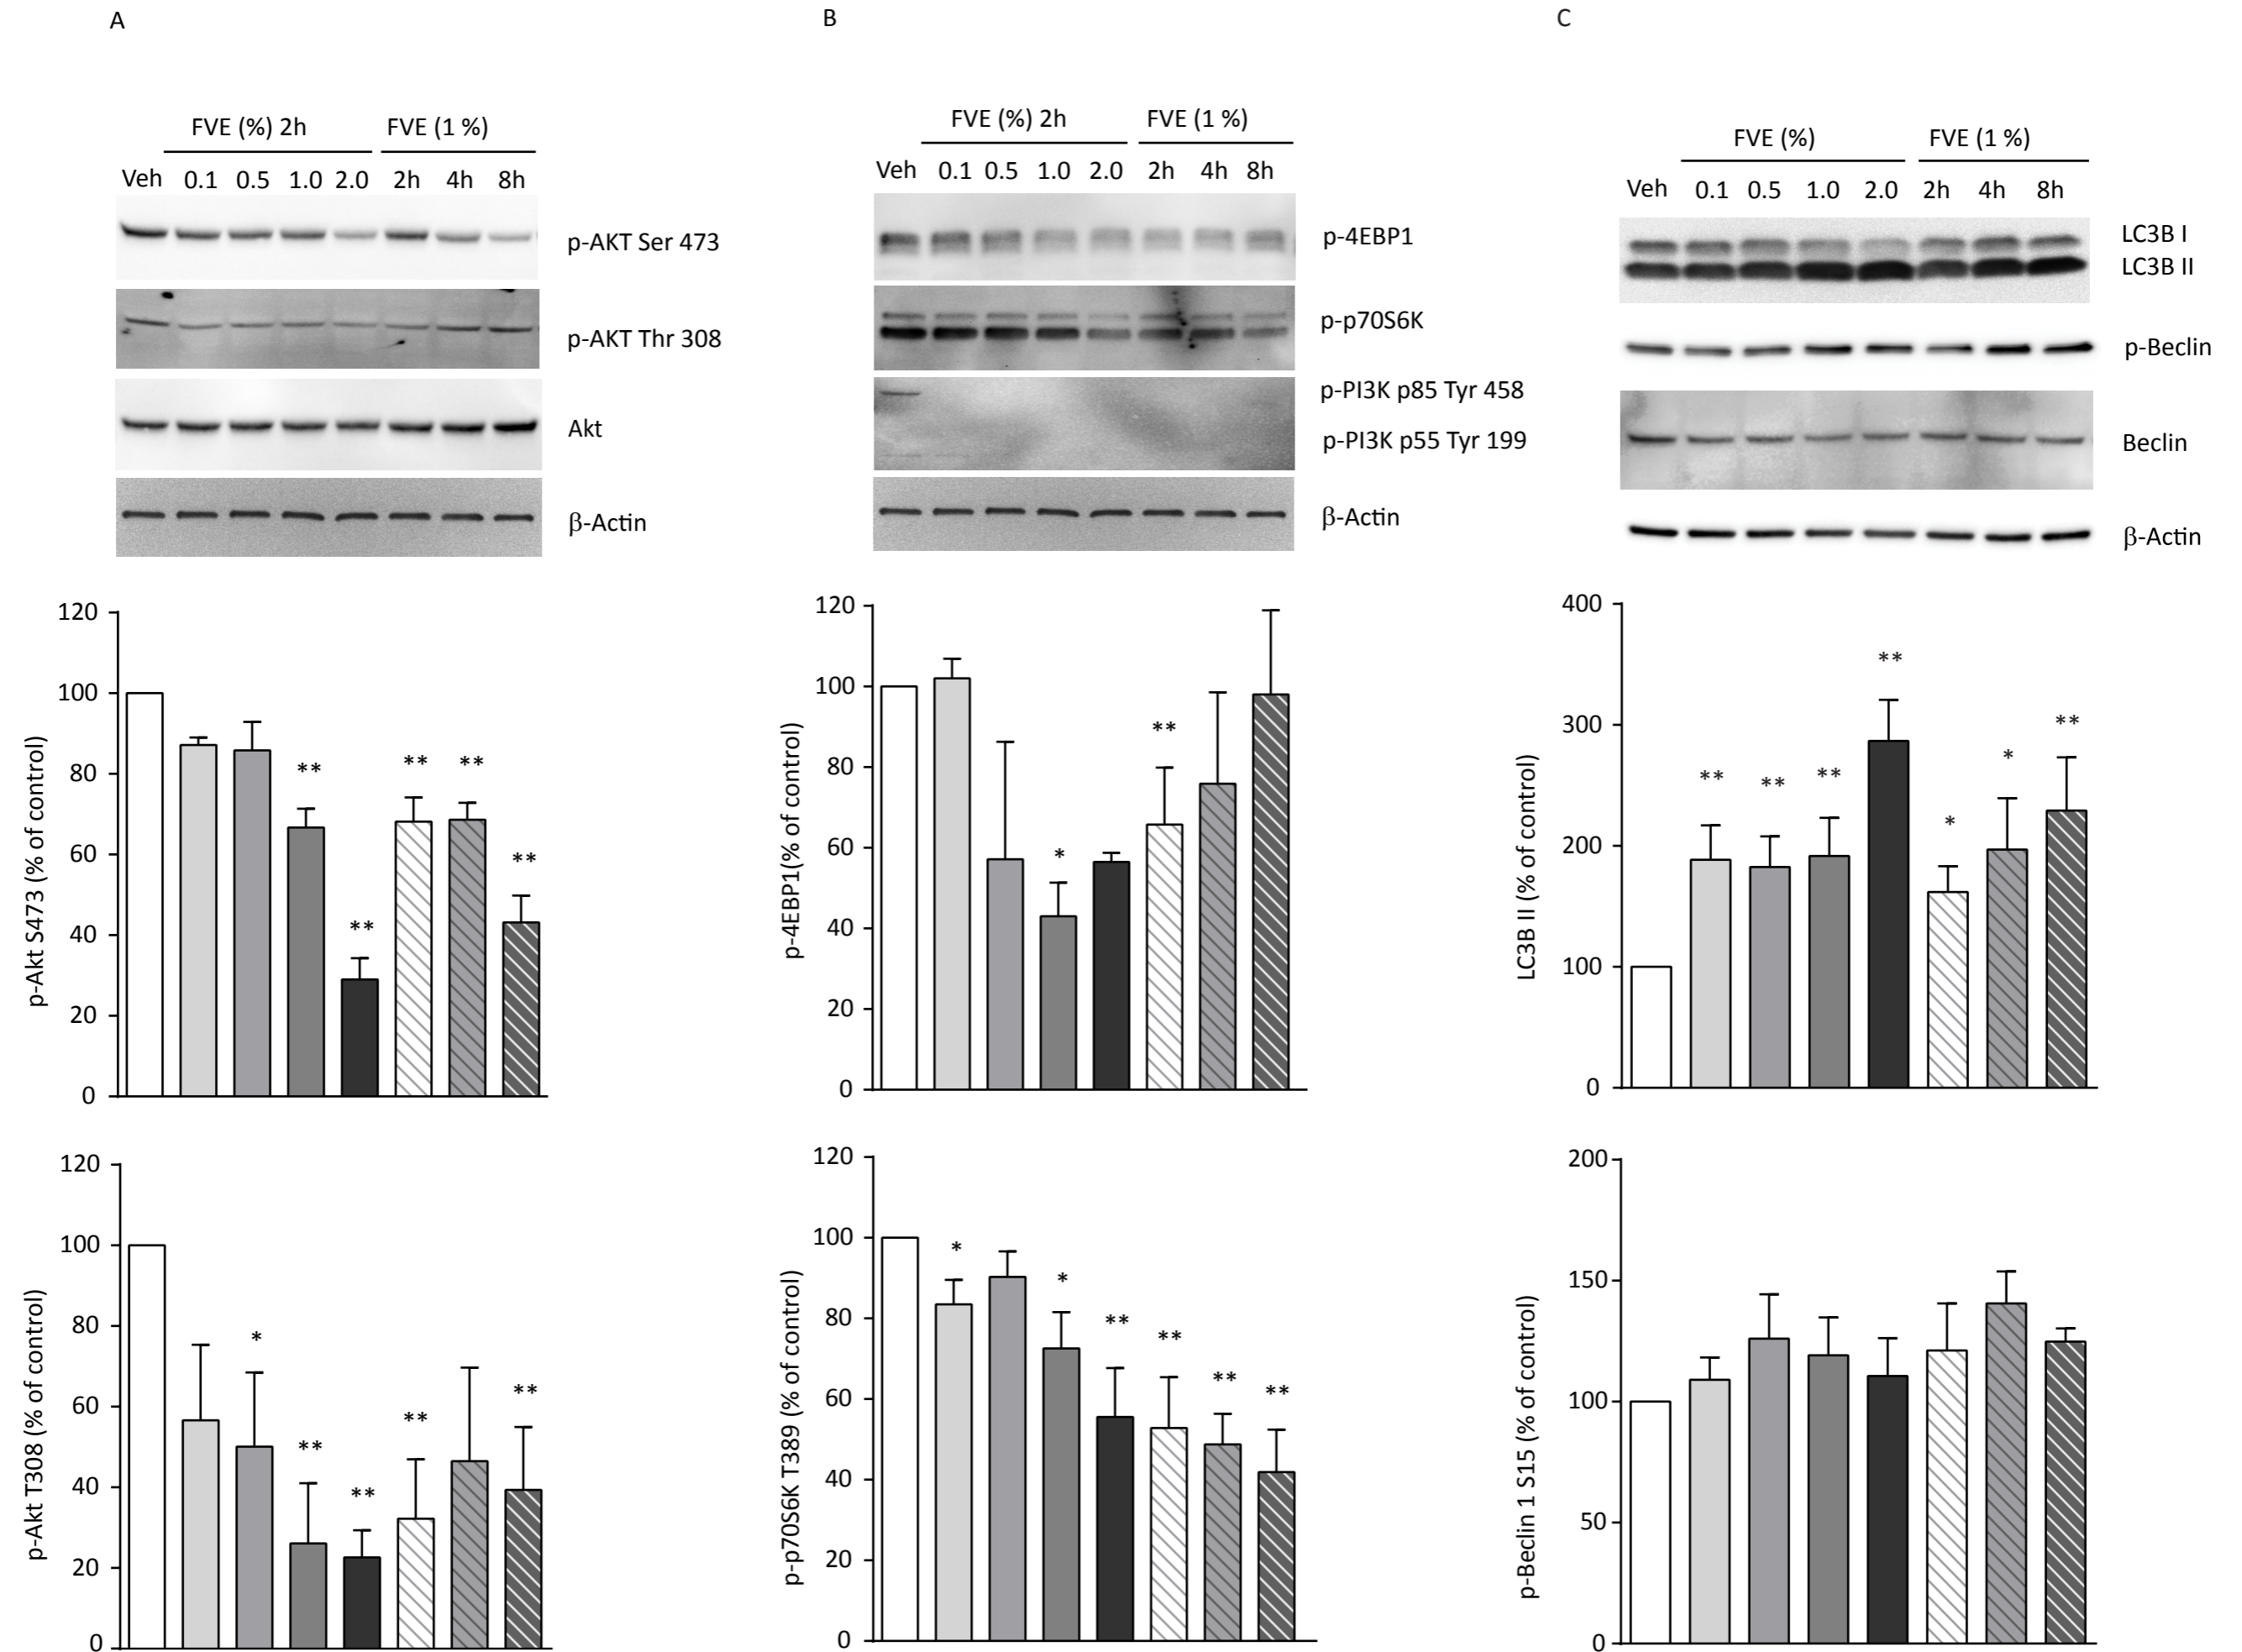

Fig. S8

A

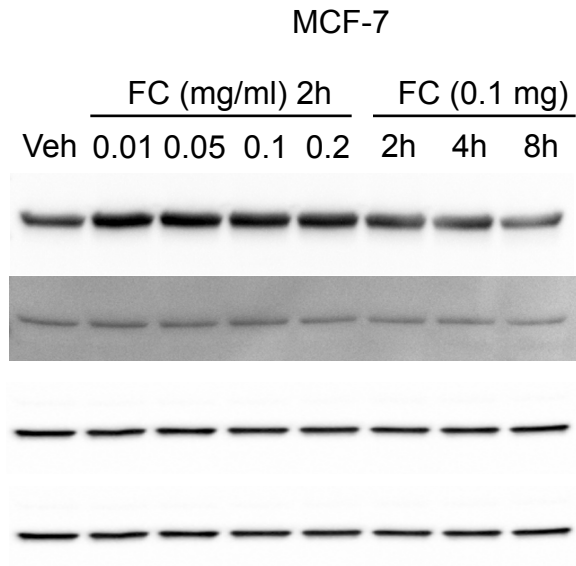

B

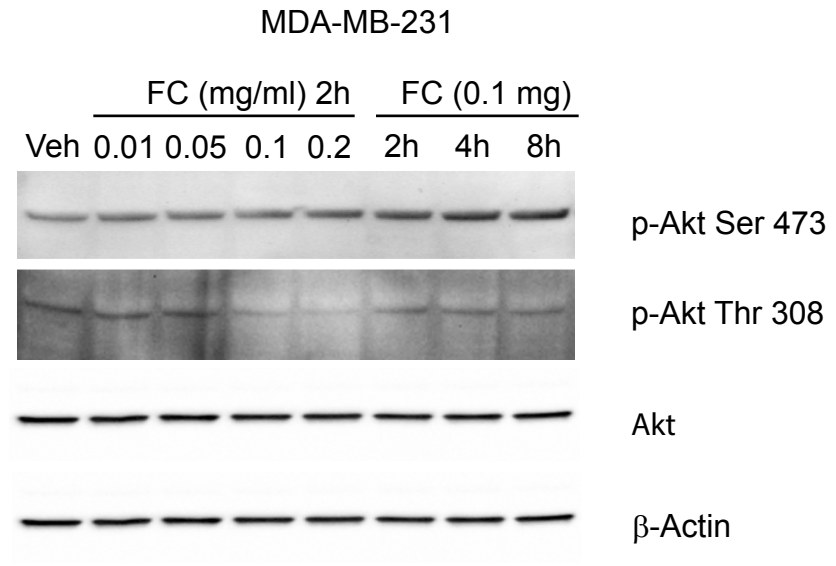

Supplement: MOESM1 [file 10208248]
